# Supplementary material for: People in early stages of Parkinson’s disease are able to intentionally reweight the use of visual information for postural control
Source: PeerJ. 2020 Feb 12;8:e8552. doi: 10.7717/peerj.8552 (PMC7023834; doi:10.7717/peerj.8552)
Supplement: Supplemental Information 1 [file peerj-08-8552-s001.xlsx]

## Sheet: no_mov_room
group	participant	mean sway amplitude_ap	mean sway amplitude_ml
DP	1	0.26915	0.12177
DP	2	0.48067	0.13611
DP	3	0.35317	0.075431
DP	4	0.48368	0.070535
DP	5	0.51305	0.32834
DP	6	0.57327	0.17593
DP	7	0.75478	0.16756
DP	8	0.53334	0.26575
DP	9	0.27473	0.10455
DP	10	0.3801	0.16917
DP	11	0.6438	0.24911
DP	12	0.54338	0.1162
DP	13	0.4741	0.20427
DP	14	0.95636	0.4063
DP	15	0.80198	0.23003
DP	16	0.82637	0.14691
DP	17	0.57991	0.29784
DP	18	0.31161	0.33238
DP	19	0.61195	0.353
DP	20	0.2904	0.17321
DP	21	0.2929	0.089492
	mean	0.521367	0.200661
	std.dev.	#NAME?	#NAME?
CONTROL	1	0.43331	0.155
CONTROL	2	0.27383	0.08288
CONTROL	3	0.36889	0.10388
CONTROL	4	0.27295	0.06396
CONTROL	5	0.53227	0.18017
CONTROL	6	0.73481	0.26171
CONTROL	7	0.24747	0.070892
CONTROL	8	0.51418	0.11446
CONTROL	9	0.40373	0.20151
CONTROL	10	0.32919	0.069808
CONTROL	11	0.4765	0.37794
CONTROL	12	0.21343	0.19038
CONTROL	13	0.51459	0.16045
CONTROL	14	0.31916	0.20555
CONTROL	15	0.074662	0.015895
CONTROL	16	0.36784	0.14347
CONTROL	17	0.73667	0.11143
CONTROL	18	0.67225	0.081988
CONTROL	19	0.44452	0.12351
CONTROL	20	0.82445	0.20877
CONTROL	21	0.29793	0.13246
	mean	0.431078	0.145529
	std.dev.	#NAME?	#NAME?

## Sheet: periodic_no_info
group	participant	trial	mean sway amplitude	coherence	gain
DP	1	1	0.35203	0.89931	0.55646
DP	1	2	0.35603	0.97317	0.54475
DP	1	3	0.51535	0.93839	0.65626
		mean	0.407803	0.936957	0.585823
DP	2	1	0.70832	0.91009	0.9684
DP	2	2	0.71191	0.9046	0.77262
DP	2	3	0.65172	0.86314	0.78568
		mean	0.69065	0.89261	0.842233
DP	3	1	0.34421	0.95386	0.46981
DP	3	2	0.44534	0.25558	0.21446
DP	3	3	0.41853	0.92765	0.70764
		mean	0.402693	0.712363	0.46397
DP	4	1	0.59653	0.94474	0.65721
DP	4	2	0.54476	0.93863	0.69399
DP	4	3	0.63861	0.71032	0.45161
		mean	0.5933	0.864563	0.600937
DP	5	1	0.54669	0.7687	0.63066
DP	5	2	0.74623	0.8784	0.88126
DP	5	3	0.70264	0.63414	0.8393
		mean	0.665187	0.760413	0.78374
DP	6	1	0.65155	0.97271	1.0519
DP	6	2	0.56132	0.98321	1.0919
DP	6	3	0.6279	0.9067	1.0486
		mean	0.61359	0.954207	1.06413
DP	7	1	0.96614	0.93305	1.365
DP	7	2	0.9394	0.99283	1.1457
DP	7	3	0.69077	0.98219	0.8678
		mean	0.865437	0.969357	1.12617
DP	8	1	0.69702	0.94762	0.41103
DP	8	2	0.62152	0.78296	0.58539
DP	8	3	0.87911	0.70882	0.36931
		mean	0.73255	0.813133	0.455243
DP	9	1	0.55053	0.87152	0.53338
DP	9	2	0.36276	0.95662	0.6805
DP	9	3	0.52731	0.90818	0.56374
		mean	0.4802	0.912107	0.59254
DP	10	1	0.73232	0.88933	0.75627
DP	10	2	0.54887	0.96427	0.85886
DP	10	3	0.6533	0.84576	0.74119
		mean	0.64483	0.899787	0.78544
DP	11	1	1.0539	0.74547	0.38709
DP	11	2	0.88161	0.91198	0.2912
DP	11	3	0.74289	0.93773	0.50836
		mean	0.8928	0.86506	0.39555
DP	12	1	0.92909	0.96751	0.90726
DP	12	2	0.67724	0.8908	0.8052
DP	12	3	0.99235	0.92965	0.85708
		mean	0.866227	0.92932	0.856513
DP	13	1	0.42238	0.89127	0.54489
DP	13	2	0.64478	0.97281	1.0677
DP	13	3	0.66908	0.88801	0.72499
		mean	0.578747	0.917363	0.779193
DP	14	1	1.2954	0.65561	0.43108
DP	14	2	1.2935	0.90798	1.4481
DP	14	3	1.3868	0.86	0.62705
		mean	1.32523	0.807863	0.83541
DP	15	1	0.39558	0.95672	0.41799
DP	15	2	0.51045	0.95215	0.34965
DP	15	3	0.39013	0.91588	0.48889
		mean	0.432053	0.941583	0.418843
DP	16	1	0.84754	0.9464	0.78366
DP	16	2	1.3181	0.88239	1.2709
DP	16	3	0.81031	0.94405	1.1494
		mean	0.991983	0.92428	1.06799
DP	17	1	0.56986	0.73895	0.50812
DP	17	2	0.63651	0.8908	0.82099
DP	17	3	0.92505	0.93614	0.5142
		mean	0.710473	0.855297	0.614437
DP	18	1	0.49621	0.90092	0.81701
DP	18	2	0.49259	0.85325	0.62164
DP	18	3	0.64029	0.97007	0.81617
		mean	0.54303	0.90808	0.751607
DP	19	1	0.49696	0.90172	0.51751
DP	19	2	1.097	0.94259	1.2307
DP	19	3	0.86541	0.99866	1.1423
		mean	0.81979	0.947657	0.963503
DP	20	1	0.44269	0.53663	0.34759
DP	20	2	0.53117	0.79002	0.38549
DP	20	3	0.48502	0.53963	0.32028
		mean	0.486293	0.622093	0.35112
DP	21	1	0.49622	0.94403	0.63185
DP	21	2	0.97635	0.96712	0.91694
DP	21	3	0.93453	0.84238	0.65127
		mean	0.802367	0.917843	0.733353
		individual means
DP	1		0.407803	0.936957	0.585823
DP	2		0.69065	0.89261	0.842233
DP	3		0.402693	0.712363	0.46397
DP	4		0.5933	0.864563	0.600937
DP	5		0.665187	0.760413	0.78374
DP	6		0.61359	0.954207	1.06413
DP	7		0.865437	0.969357	1.12617
DP	8		0.73255	0.813133	0.455243
DP	9		0.4802	0.912107	0.59254
DP	10		0.64483	0.899787	0.78544
DP	11		0.8928	0.86506	0.39555
DP	12		0.866227	0.92932	0.856513
DP	13		0.578747	0.917363	0.779193
DP	14		1.32523	0.807863	0.83541
DP	15		0.432053	0.941583	0.418843
DP	16		0.991983	0.92428	1.06799
DP	17		0.710473	0.855297	0.614437
DP	18		0.54303	0.90808	0.751607
DP	19		0.81979	0.947657	0.963503
DP	20		0.486293	0.622093	0.35112
DP	21		0.802367	0.917843	0.733353
		group mean	0.69263	0.873902	0.717512
		group std.dev.	#NAME?	#NAME?	#NAME?
CONTROL	1	1	0.37685	0.97237	0.73157
CONTROL	1	2	0.43263	0.99283	0.80503
CONTROL	1	3	0.43939	0.98603	0.73745
		mean	0.41629	0.983743	0.758017
CONTROL	2	1	0.64533	0.89161	0.52042
CONTROL	2	2	0.43044	0.98214	0.71521
CONTROL	2	3	0.50374	0.92224	0.75674
		mean	0.526503	0.931997	0.664123
CONTROL	3	1	0.52167	0.97297	0.79884
CONTROL	3	2	0.44546	0.92156	0.52981
CONTROL	3	3	0.6285	0.95635	1.0135
		mean	0.531877	0.950293	0.780717
CONTROL	4	1	0.34041	0.94342	0.26085
CONTROL	4	2	0.28941	0.97839	0.46289
CONTROL	4	3	0.29382	0.98733	0.57505
		mean	0.30788	0.969713	0.43293
CONTROL	5	1	0.65828	0.4629	0.3226
CONTROL	5	2	0.52094	0.70097	0.44561
CONTROL	5	3	0.51223	0.31255	0.21484
		mean	0.563817	0.49214	0.327683
CONTROL	6	1	0.98158	0.91313	1.2142
CONTROL	6	2	1.3403	0.97476	1.3572
CONTROL	6	3	0.70648	0.95921	0.99154
		mean	1.00945	0.949033	1.18765
CONTROL	7	1	0.62632	0.70333	0.36363
CONTROL	7	2	0.64229	0.88577	0.6362
CONTROL	7	3	0.42818	0.97081	0.59974
		mean	0.565597	0.853303	0.53319
CONTROL	8	1	0.47391	0.94194	0.56763
CONTROL	8	2	0.54683	0.65115	0.48869
CONTROL	8	3	0.50182	0.96945	0.6993
		mean	0.50752	0.85418	0.585207
CONTROL	9	1	0.49244	0.93222	0.68769
CONTROL	9	2	0.48219	0.9404	0.62692
CONTROL	9	3	0.61163	0.983	0.88301
		mean	0.528753	0.951873	0.73254
CONTROL	10	1	0.36856	0.8825	0.39041
CONTROL	10	2	0.36983	0.89788	0.39155
CONTROL	10	3	0.31507	0.65807	0.34528
		mean	0.351153	0.812817	0.375747
CONTROL	11	1	1.0293	0.98882	1.0722
CONTROL	11	2	0.7752	0.89641	0.92828
CONTROL	11	3	0.67633	0.95017	0.8376
		mean	0.826943	0.945133	0.946027
CONTROL	12	1	0.2578	0.68086	0.13092
CONTROL	12	2	0.31713	0.82567	0.3803
CONTROL	12	3	0.40502	0.87464	0.44832
		mean	0.32665	0.793723	0.319847
CONTROL	13	1	0.48203	0.84324	0.51361
CONTROL	13	2	0.54091	0.98225	0.74284
CONTROL	13	3	0.56551	0.91288	0.55044
		mean	0.529483	0.91279	0.602297
CONTROL	14	1	0.36699	0.91036	0.46048
CONTROL	14	2	0.52306	0.98048	0.6461
CONTROL	14	3	0.59455	0.88562	0.7297
		mean	0.494867	0.925487	0.612093
CONTROL	15	1	0.25056	0.86533	0.25859
CONTROL	15	2	0.52498	0.74087	0.24054
CONTROL	15	3	0.60257	0.65879	0.35699
		mean	0.45937	0.754997	0.285373
CONTROL	16	1	0.39936	0.96323	0.60075
CONTROL	16	2	0.30701	0.9521	0.72819
CONTROL	16	3	0.45599	0.91525	0.69761
		mean	0.387453	0.943527	0.675517
CONTROL	17	1	0.57212	0.88631	0.89391
CONTROL	17	2	0.60574	0.91903	0.97122
CONTROL	17	3	0.88166	0.78977	0.8184
		mean	0.686507	0.865037	0.89451
CONTROL	18	1	0.58086	0.94454	0.67242
CONTROL	18	2	0.91437	0.96642	0.75844
CONTROL	18	3	0.73897	0.97135	0.81924
		mean	0.744733	0.96077	0.750033
CONTROL	19	1	0.53771	0.9892	1.0046
CONTROL	19	2	0.50754	0.98475	0.91554
CONTROL	19	3	0.59779	0.98703	0.99488
		mean	0.54768	0.986993	0.971673
CONTROL	20	1	0.84545	0.96735	0.74048
CONTROL	20	2	0.81807	0.74394	0.474
CONTROL	20	3	0.99785	0.80122	0.67076
		mean	0.887123	0.837503	0.628413
CONTROL	21	1	0.38118	0.9614	0.54806
CONTROL	21	2	0.34678	0.81481	0.26495
CONTROL	21	3	0.37835	0.73596	0.32684
		mean	0.36877	0.83739	0.37995
		individual means
CONTROL	1		0.41629	0.983743	0.758017
CONTROL	2		0.526503	0.931997	0.664123
CONTROL	3		0.531877	0.950293	0.780717
CONTROL	4		0.30788	0.969713	0.43293
CONTROL	5		0.563817	0.49214	0.327683
CONTROL	6		1.00945	0.949033	1.18765
CONTROL	7		0.565597	0.853303	0.53319
CONTROL	8		0.50752	0.85418	0.585207
CONTROL	9		0.528753	0.951873	0.73254
CONTROL	10		0.351153	0.812817	0.375747
CONTROL	11		0.826943	0.945133	0.946027
CONTROL	12		0.32665	0.793723	0.319847
CONTROL	13		0.529483	0.91279	0.602297
CONTROL	14		0.494867	0.925487	0.612093
CONTROL	15		0.45937	0.754997	0.285373
CONTROL	16		0.387453	0.943527	0.675517
CONTROL	17		0.686507	0.865037	0.89451
CONTROL	18		0.744733	0.96077	0.750033
CONTROL	19		0.54768	0.986993	0.971673
CONTROL	20		0.887123	0.837503	0.628413
CONTROL	21		0.36877	0.83739	0.37995
		group mean	0.550877	0.881545	0.640168
		group std.dev.	#NAME?	#NAME?	#NAME?

## Sheet: periodic_info+resit
group	participant	trial	mean sway amplitude	coherence	gain
DP	1	1	0.51633	0.9853	0.78659
DP	1	2	0.44283	0.95324	0.6
DP	1	3	0.41344	0.93735	0.66025
		mean	0.457533	0.95863	0.68228
DP	2	1	0.76346	0.9665	1.056
DP	2	2	0.63206	0.96832	0.73842
DP	2	3	0.6537	0.90508	1.1162
		mean	0.683073	0.946633	0.970207
DP	3	1	0.3714	0.96242	0.62237
DP	3	2	0.45283	0.94016	0.65566
DP	3	3	0.52513	0.98089	0.83235
		mean	0.449787	0.961157	0.70346
DP	4	1	0.53814	0.92645	0.75251
DP	4	2	0.45731	0.75279	0.67588
DP	4	3	0.39168	0.67603	0.48296
		mean	0.462377	0.78509	0.637117
DP	5	1	0.49215	0.95952	0.79724
DP	5	2	0.48329	0.90362	0.81647
DP	5	3	0.59102	0.95252	0.6973
		mean	0.522153	0.938553	0.770337
DP	6	1	0.49012	0.97865	0.50258
DP	6	2	0.5669	0.91154	0.71628
DP	6	3	0.61951	0.9057	0.68625
		mean	0.558843	0.931963	0.635037
DP	7	1	0.78988	0.97689	1.0903
DP	7	2	1.0004	0.9836	1.1697
DP	7	3	0.69502	0.97358	1.0541
		mean	0.828433	0.978023	1.1047
DP	8	1	0.42593	0.15505	0.19278
DP	8	2	0.99727	0.77535	0.24767
DP	8	3	0.71771	0.61853	0.27122
		mean	0.713637	0.51631	0.237223
DP	9	1	0.4608	0.9284	0.55615
DP	9	2	0.48159	0.86515	0.49651
DP	9	3	0.51958	0.98615	0.59029
		mean	0.487323	0.926567	0.54765
DP	10	1	0.61202	0.85596	0.68572
DP	10	2	0.78035	0.98188	0.59705
DP	10	3	0.64751	0.9133	0.63134
		mean	0.67996	0.917047	0.638037
DP	11	1	0.96376	0.53193	0.49162
DP	11	2	0.6916	0.81733	0.58951
DP	11	3	0.8622	0.21285	0.10396
		mean	0.839187	0.520703	0.39503
DP	12	1	0.67125	0.98011	1.2347
DP	12	2	0.58714	0.99224	0.97707
DP	12	3	0.68223	0.89763	0.74941
		mean	0.646873	0.95666	0.98706
DP	13	1	0.49059	0.90826	0.25006
DP	13	2	0.4403	0.38607	0.24669
DP	13	3	0.4997	0.87726	0.31898
		mean	0.476863	0.723863	0.27191
DP	14	1	0.83946	0.97619	1.4322
DP	14	2	0.93623	0.89911	0.91032
DP	14	3	0.97178	0.86559	0.67925
		mean	0.915823	0.91363	1.00726
DP	15	1	0.39442	0.85146	0.38603
DP	15	2	0.382	0.90193	0.37424
DP	15	3	0.45313	0.85247	0.30185
		mean	0.40985	0.86862	0.35404
DP	16	1	0.68971	0.90124	1.0523
DP	16	2	0.55698	0.94983	1.0626
DP	16	3	1.0099	0.97519	1.0754
		mean	0.752197	0.942087	1.06343
DP	17	1	0.46472	0.74376	0.38794
DP	17	2	0.59771	0.43844	0.37179
DP	17	3	0.85506	0.85177	0.29795
		mean	0.639163	0.67799	0.35256
DP	18	1	0.36753	0.9266	0.62786
DP	18	2	0.34849	0.84577	0.51956
DP	18	3	0.45779	0.82608	0.54255
		mean	0.39127	0.86615	0.563323
DP	19	1	0.47423	0.69126	0.43606
DP	19	2	1.0654	0.90201	0.71999
DP	19	3	0.8035	0.97457	0.92435
		mean	0.781043	0.855947	0.693467
DP	20	1	0.42433	0.91021	0.43108
DP	20	2	0.69919	0.8994	0.45273
DP	20	3	0.36222	0.94974	0.52754
		mean	0.495247	0.919783	0.47045
DP	21	1	0.5272	0.84514	0.44158
DP	21	2	0.47583	0.96837	0.69993
DP	21	3	1.0307	0.86704	0.60493
		mean	0.67791	0.893517	0.582147
		individual means
DP	1		0.457533	0.95863	0.68228
DP	2		0.683073	0.946633	0.970207
DP	3		0.449787	0.961157	0.70346
DP	4		0.462377	0.78509	0.637117
DP	5		0.522153	0.938553	0.770337
DP	6		0.558843	0.931963	0.635037
DP	7		0.828433	0.978023	1.1047
DP	8		0.713637	0.51631	0.237223
DP	9		0.487323	0.926567	0.54765
DP	10		0.67996	0.917047	0.638037
DP	11		0.839187	0.520703	0.39503
DP	12		0.646873	0.95666	0.98706
DP	13		0.476863	0.723863	0.27191
DP	14		0.915823	0.91363	1.00726
DP	15		0.40985	0.86862	0.35404
DP	16		0.752197	0.942087	1.06343
DP	17		0.639163	0.67799	0.35256
DP	18		0.39127	0.86615	0.563323
DP	19		0.781043	0.855947	0.693467
DP	20		0.495247	0.919783	0.47045
DP	21		0.67791	0.893517	0.582147
		group mean	0.612788	0.857092	0.650796
		group std.dev.	#NAME?	#NAME?	#NAME?
CONTROL	1	1	0.33327	0.93976	0.44903
CONTROL	1	2	0.34621	0.64928	0.36655
CONTROL	1	3	0.31052	0.74885	0.42784
		mean	0.33	0.779297	0.414473
CONTROL	2	1	0.36893	0.96438	0.51728
CONTROL	2	2	0.4006	0.93742	0.5029
CONTROL	2	3	0.26298	0.81782	0.33318
		mean	0.34417	0.90654	0.45112
CONTROL	3	1	0.343	0.86033	0.52856
CONTROL	3	2	0.57918	0.92506	0.6743
CONTROL	3	3	0.84422	0.94172	1.0915
		mean	0.5888	0.909037	0.764787
CONTROL	4	1	0.2429	0.51957	0.15926
CONTROL	4	2	0.26029	0.93024	0.35421
CONTROL	4	3	0.2913	0.88165	0.28726
		mean	0.26483	0.777153	0.26691
CONTROL	5	1	0.52656	0.71597	0.26926
CONTROL	5	2	0.53492	0.97472	0.54997
CONTROL	5	3	0.67221	0.78634	0.33835
		mean	0.577897	0.825677	0.38586
CONTROL	6	1	0.96247	0.9492	0.78475
CONTROL	6	2	0.76207	0.76042	0.76613
CONTROL	6	3	1.0321	0.8936	0.9877
		mean	0.91888	0.86774	0.846193
CONTROL	7	1	0.25264	0.50678	0.17578
CONTROL	7	2	0.56749	0.93431	0.43127
CONTROL	7	3	0.39532	0.93771	0.50798
		mean	0.40515	0.792933	0.371677
CONTROL	8	1	0.32382	0.95249	0.58771
CONTROL	8	2	0.73823	0.89851	0.64046
CONTROL	8	3	0.82342	0.8586	0.50407
		mean	0.62849	0.9032	0.577413
CONTROL	9	1	0.58074	0.86248	0.50541
CONTROL	9	2	0.52338	0.85117	0.54935
CONTROL	9	3	0.39287	0.598	0.29457
		mean	0.498997	0.77055	0.449777
CONTROL	10	1	0.39042	0.86365	0.37738
CONTROL	10	2	0.35202	0.9163	0.55218
CONTROL	10	3	0.60181	0.83638	0.54466
		mean	0.448083	0.87211	0.491407
CONTROL	11	1	0.5398	0.92515	0.87603
CONTROL	11	2	0.5102	0.99096	0.82971
CONTROL	11	3	0.98827	0.96112	0.7562
		mean	0.679423	0.959077	0.820647
CONTROL	12	1	0.50622	0.82023	0.47727
CONTROL	12	2	0.44337	0.91763	0.34765
CONTROL	12	3	0.3957	0.7627	0.2989
		mean	0.44843	0.83352	0.374607
CONTROL	13	1	0.48433	0.91816	0.61676
CONTROL	13	2	0.4339	0.65504	0.26017
CONTROL	13	3	0.44351	0.86993	0.54394
		mean	0.453913	0.814377	0.473623
CONTROL	14	1	0.44542	0.84791	0.56108
CONTROL	14	2	0.65407	0.9634	0.64073
CONTROL	14	3	0.64894	0.93762	0.3737
		mean	0.58281	0.91631	0.52517
CONTROL	15	1	0.54132	0.70332	0.22161
CONTROL	15	2	0.63554	0.98673	0.4362
CONTROL	15	3	0.35753	0.64559	0.22195
		mean	0.511463	0.778547	0.293253
CONTROL	16	1	0.36528	0.92949	0.70103
CONTROL	16	2	0.46915	0.85597	0.60086
CONTROL	16	3	0.43074	0.9212	0.63008
		mean	0.421723	0.90222	0.64399
CONTROL	17	1	0.53293	0.88348	0.72339
CONTROL	17	2	0.53259	0.85503	0.57062
CONTROL	17	3	0.61759	0.96848	1.0166
		mean	0.561037	0.90233	0.770203
CONTROL	18	1	0.56912	0.87968	0.55809
CONTROL	18	2	0.56881	0.60983	0.3861
CONTROL	18	3	0.64201	0.96752	0.89328
		mean	0.593313	0.81901	0.61249
CONTROL	19	1	0.56016	0.98545	1.0628
CONTROL	19	2	0.55795	0.99944	1.2273
CONTROL	19	3	0.56637	0.9839	0.93977
		mean	0.561493	0.989597	1.07662
CONTROL	20	1	0.66216	0.98554	0.93292
CONTROL	20	2	0.71153	0.92082	0.81566
CONTROL	20	3	0.65522	0.94875	0.70511
		mean	0.676303	0.951703	0.817897
CONTROL	21	1	0.37794	0.79793	0.2704
CONTROL	21	2	0.37455	0.9064	0.47125
CONTROL	21	3	0.36649	0.97792	0.4499
		mean	0.372993	0.894083	0.397183
		individual means
CONTROL	1		0.33	0.779297	0.414473
CONTROL	2		0.34417	0.90654	0.45112
CONTROL	3		0.5888	0.909037	0.764787
CONTROL	4		0.26483	0.777153	0.26691
CONTROL	5		0.577897	0.825677	0.38586
CONTROL	6		0.91888	0.86774	0.846193
CONTROL	7		0.40515	0.792933	0.371677
CONTROL	8		0.62849	0.9032	0.577413
CONTROL	9		0.498997	0.77055	0.449777
CONTROL	10		0.448083	0.87211	0.491407
CONTROL	11		0.679423	0.959077	0.820647
CONTROL	12		0.44843	0.83352	0.374607
CONTROL	13		0.453913	0.814377	0.473623
CONTROL	14		0.58281	0.91631	0.52517
CONTROL	15		0.511463	0.778547	0.293253
CONTROL	16		0.421723	0.90222	0.64399
CONTROL	17		0.561037	0.90233	0.770203
CONTROL	18		0.593313	0.81901	0.61249
CONTROL	19		0.561493	0.989597	1.07662
CONTROL	20		0.676303	0.951703	0.817897
CONTROL	21		0.372993	0.894083	0.397183
		group mean	0.517533	0.865	0.56311
		group std.dev.	#NAME?	#NAME?	#NAME?
